# Supplementary material for: Sexual and gender harassment and use of psychotropic medication among Swedish workers: a prospective cohort study
Source: HighWire-hosted journal article supplement (doi:10.1136/oemed-2021-108087), 2022-03-09
Supplement: oemed-2021-108087supp001_data_supplement.pdf [file oemed-2021-108087supp001_data_supplement.pdf]

## APPENDIX

**Analyses stratified by gender****Table A1 Results from Cox regression analyses on the association between different combinations of work-related sexual and gender harassment (GBVH) and psychotropics for women and men separately, presented as hazard ratios (HR) and 95% confidence intervals.**

|                                        | Women        |               |                     | Men           |               |                     |
|----------------------------------------|--------------|---------------|---------------------|---------------|---------------|---------------------|
|                                        | Exposed      | Psychotropics |                     | Exposed       | Psychotropics |                     |
|                                        | N (%)        | N             | HR (95% CI)         | N (%)         | N             | HR (95% CI)         |
| <b>GBVH</b>                            |              |               |                     |               |               |                     |
| Not in 12 months                       | 9 511 (83.2) | 2 107         | 1                   | 10 417 (94.4) | 1 430         | 1                   |
| Gender harassment/no sexual harassment | 982 (9.0)    | 242           | 1.16 (1.01 to 1.33) | 370 (3.4)     | 65            | 1.30 (1.01 to 1.67) |
| Sexual harassment/no gender harassment | 612 (5.4)    | 164           | 1.17 (1.00 to 1.38) | 157 (1.4)     | 29            | 1.25 (0.86 to 1.81) |
| Sexual and gender harassment           | 331 (2.9)    | 90            | 1.27 (1.03 to 1.57) | 87 (0.8)      | 16            | 1.30 (0.79 to 2.14) |

Adjusted for survey year, age, education, family situation, income, parental migration background, managerial responsibilities, and industry classification.

**Table A2 Results from Cox regression analyses on the association between work-related sexual harassment (SH) and gender harassment and psychotropics for women and men separately, presented as hazard ratios (HR) and 95% confidence intervals.**

|                                     | Women   |               |                     | Men     |               |                     |
|-------------------------------------|---------|---------------|---------------------|---------|---------------|---------------------|
|                                     | Exposed | Psychotropics |                     | Exposed | Psychotropics |                     |
|                                     | N       | N             | HR (95% CI)         | N       | N             | HR (95% CI)         |
| <b>Workplace SH by any harasser</b> |         |               |                     |         |               |                     |
| Not in 12 months                    | 10 493  | 2 349         | 1                   | 11 787  | 1 495         | 1                   |
| Once in 12 months                   | 658     | 172           | 1.13 (0.96 to 1.32) | 140     | 24            | 1.14 (0.76 to 1.71) |
| Monthly to daily                    | 224     | 68            | 1.33 (1.06 to 1.66) | 73      | 14            | 1.39 (0.90 to 2.14) |
| <b>Gender harassment</b>            |         |               |                     |         |               |                     |
| Not in 12 months                    | 10 123  | 2 271         | 1                   | 10 574  | 1 459         | 1                   |
| Once in 12 months                   | 881     | 225           | 1.19 (1.04 to 1.37) | 324     | 59            | 1.31 (1.01 to 1.70) |
| Monthly to daily                    | 432     | 107           | 1.14 (0.93 to 1.38) | 133     | 22            | 1.23 (0.81 to 1.88) |

Adjusted for survey year, age, education, family situation, income, parental migration background, managerial responsibilities, and industry classification.

**Analyses stratified by age****Table A3 Results from Cox regression analyses on the association between different combinations of work-related sexual and gender harassment (GBVH) and psychotropics for age groups separately, presented as hazard ratios (HR) and 95% confidence intervals.**

|                                        | 16-25               | 26-35               | 36-45               | 46-55               | 56-64               |
|----------------------------------------|---------------------|---------------------|---------------------|---------------------|---------------------|
|                                        | HR (95% CI)         |
| <b>N</b>                               | 1 858               | 4 032               | 5 868               | 5 969               | 4 740               |
| <b>GBVH</b>                            |                     |                     |                     |                     |                     |
| Not in 12 months                       | 1                   | 1                   | 1                   | 1                   | 1                   |
| Gender harassment/no sexual harassment | 0.92 (0.55 to 1.55) | 1.35 (1.06 to 1.73) | 1.18 (0.94 to 1.47) | 1.16 (0.91 to 1.47) | 1.18 (0.88 to 1.58) |
| Sexual harassment/no gender harassment | 1.31 (0.91 to 1.87) | 1.12 (0.83 to 1.52) | 1.08 (0.77 to 1.50) | 1.23 (0.92 to 1.65) | 1.26 (0.80 to 2.00) |
| Sexual and gender harassment           | 0.80 (0.43 to 1.48) | 1.37 (0.97 to 1.93) | 1.39 (0.95 to 2.05) | 1.17 (0.73 to 1.87) | 1.72 (1.00 to 3.00) |

Adjusted for survey year, gender, education, family situation, income, parental migration background, managerial responsibilities, and industry classification.

**Table A4 Results from Cox regression analyses on the association between work-related sexual harassment (SH) and gender harassment and psychotropics for age groups, presented as hazard ratios (HR) and 95% confidence intervals.**

|                                     | 16-25               | 26-35               | 36-45               | 46-55               | 56-64               |
|-------------------------------------|---------------------|---------------------|---------------------|---------------------|---------------------|
|                                     | HR (95% CI)         |
| <b>N</b>                            | 1 858               | 4 032               | 5 868               | 5 969               | 4 740               |
| <b>Workplace SH by any harasser</b> |                     |                     |                     |                     |                     |
| Not in 12 months                    | 1                   | 1                   | 1                   | 1                   | 1                   |
| Once in 12 months                   | 1.01 (0.67 to 1.52) | 1.07 (0.81 to 1.42) | 1.06 (0.78 to 1.46) | 1.20 (0.90 to 1.61) | 1.47 (0.97 to 2.21) |
| Monthly to daily                    | 1.31 (0.83 to 2.07) | 1.34 (0.93 to 1.92) | 1.42 (0.95 to 2.14) | 1.18 (0.74 to 1.89) | 1.32 (0.68 to 2.57) |
| <b>Gender harassment</b>            |                     |                     |                     |                     |                     |
| Not in 12 months                    | 1                   | 1                   | 1                   | 1                   | 1                   |
| Once in 12 months                   | 0.70 (0.42 to 1.17) | 1.39 (1.09 to 1.77) | 1.28 (1.02 to 1.60) | 1.19 (0.92 to 1.53) | 1.23 (0.90 to 1.67) |
| Monthly to daily                    | 1.15 (0.63 to 2.12) | 1.22 (0.87 to 1.72) | 1.08 (0.75 to 1.54) | 1.12 (0.78 to 1.62) | 1.27 (0.81 to 1.99) |

Adjusted for survey year, gender, education, family situation, income, parental migration background, managerial responsibilities, and industry classification.

### **Sensitivity analyses with 2-year follow-up**

**Table A5 Sensitivity analysis: Results from Cox regression analyses on the association between different combinations of work-related sexual and gender harassment (GBVH) and psychotropics, follow-up censored to 2 years, presented as hazard ratios (HR) and 95% confidence intervals.**

|                                        | Exposed | Psychotropics |                     |
|----------------------------------------|---------|---------------|---------------------|
|                                        | N       | N             | HR (95% CI)         |
| <b>GBVH</b>                            |         |               |                     |
| Not in 12 months                       | 20 428  | 2 193         | 1                   |
| Gender harassment/no sexual harassment | 1 381   | 190           | 1.20 (0.98 to 1.45) |
| Sexual harassment/no gender harassment | 789     | 130           | 1.08 (0.83 to 1.40) |
| Sexual and gender harassment           | 426     | 61            | 1.45 (1.08 to 1.96) |

Adjusted for survey year, gender, age, education, family situation, income, parental migration background, managerial responsibilities, and industry classification.

**Table A6 Sensitivity analysis: Results from Cox regression analyses on the association between work-related sexual harassment (SH) and gender harassment and psychotropics, follow-up censored to 2 years, presented as hazard ratios (HR) and 95% confidence intervals.**

|                                      | Exposed | Psychotropics |                     |
|--------------------------------------|---------|---------------|---------------------|
|                                      | N       | N             | HR (95% CI)         |
| <b>Workplace SH by any harasser</b>  |         |               |                     |
| Not in 12 months                     | 21 280  | 2 383         | 1                   |
| Once in 12 months                    | 798     | 131           | 1.04 (0.81 to 1.34) |
| Monthly to daily                     | 389     | 60            | 1.51 (1.11 to 2.04) |
| <b>SH by superiors or colleagues</b> |         |               |                     |
| Not in 12 months                     | 22 125  | 2 522         | 1                   |
| Once in 12 months                    | 207     | 34            | 1.10 (0.35 to 3.43) |
| Monthly to daily                     | 135     | 18            | 1.66 (0.62 to 4.45) |
| <b>SH by others (e.g., clients)</b>  |         |               |                     |
| Not in 12 months                     | 21 512  | 2 419         | 1                   |
| Once in 12 months                    | 658     | 107           | 1.43 (0.71 to 2.88) |
| Monthly to daily                     | 297     | 48            | 1.29 (0.54 to 3.13) |
| <b>Gender harassment</b>             |         |               |                     |
| Not in 12 months                     | 20 697  | 2 323         | 1                   |
| Once in 12 months                    | 1 205   | 170           | 1.47 (0.99 to 2.20) |
| Monthly to daily                     | 565     | 81            | 1.58 (0.87 to 2.87) |

Adjusted for survey year, gender, age, education, family situation, income, parental migration background, managerial responsibilities, and industry classification.

**Sensitivity analyses with full study sample (no exclusion due to psychotropics use),  
adjusted for previous medication**

**Table A7 Sensitivity analysis: Analyses with the full study sample, not excluding individuals who had purchased medication in the survey year. Analyses adjusted for previous psychotropics use.**

|                                        | Exposed | Psychotropics |                     |
|----------------------------------------|---------|---------------|---------------------|
|                                        | N       | N             | HR (95% CI)         |
| <b>GBVH</b>                            |         |               |                     |
| Not in 12 months                       | 22 280  | 3 537         | 1                   |
| Gender harassment/no sexual harassment | 1 579   | 307           | 1.14 (1.02 to 1.29) |
| Sexual harassment/no gender harassment | 868     | 193           | 1.22 (1.05 to 1.42) |
| Sexual and gender harassment           | 485     | 106           | 1.27 (1.05 to 1.55) |

Adjusted for survey year, gender, age, education, family situation, income, parental migration background, managerial responsibilities, industry classification, previous psychotropics.

**Table A8 Sensitivity analysis: Analyses with the full study sample, not excluding individuals who had purchased medication in the survey year. Analyses adjusted for previous psychotropics use.**

|                                      | Exposed | Psychotropics |                     |
|--------------------------------------|---------|---------------|---------------------|
|                                      | N       | N             | HR (95% CI)         |
| <b>Workplace SH by any harasser</b>  |         |               |                     |
| Not in 12 months                     | 23 859  | 3 844         | 1                   |
| Once in 12 months                    | 909     | 196           | 1.16 (1.00 to 1.34) |
| Monthly to daily                     | 444     | 103           | 1.34 (1.10 to 1.63) |
| <b>SH by superiors or colleagues</b> |         |               |                     |
| Not in 12 months                     | 24 810  | 4 061         | 1                   |
| Once in 12 months                    | 256     | 48            | 1.02 (0.76 to 1.35) |
| Monthly to daily                     | 146     | 34            | 1.45 (1.03 to 2.03) |
| <b>SH by others (e.g., clients)</b>  |         |               |                     |
| Not in 12 months                     | 24 131  | 3 898         | 1                   |
| Once in 12 months                    | 739     | 163           | 1.18 (1.00 to 1.38) |
| Monthly to daily                     | 342     | 82            | 1.35 (1.09 to 1.68) |
| <b>Gender harassment</b>             |         |               |                     |
| Not in 12 months                     | 23 148  | 3 730         | 1                   |
| Once in 12 months                    | 1 393   | 284           | 1.19 (1.06 to 1.35) |
| Monthly to daily                     | 671     | 129           | 1.09 (0.92 to 1.30) |

Adjusted for survey year, gender, age, education, family situation, income, parental migration background, managerial responsibilities, industry classification, and previous psychotropics.
